# Supplementary material for: Extreme events driving year-to-year differences in gross primary productivity across the US
Source: Copernicus journal article supplement (doi:10.5194/bg-18-6579-2021), 2021-12-23
Supplement: Supplementary file 1 [file bg-18-6579-2021-supplement.zip]

Archive with 3 entries (3 files):
- bg-18-6579-2021-supplement-title-page.pdf
- M01_CONUS.mp4
- bg-2021-49-supplement-version5.pdf
