# Supplementary material for: Extreme events driving year-to-year differences in gross primary productivity across the US
Source: Copernicus journal article supplement (doi:10.5194/bg-18-6579-2021), 2021-12-23
Supplement: Supplementary file 1 [file bg-18-6579-2021-supplement.zip › bg-18-6579-2021-supplement-title-page.pdf]

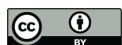

*Supplement of*

**Extreme events driving year-to-year differences in gross primary productivity across the US**

**Alexander J. Turner et al.**

*Correspondence to:* Alexander J. Turner (turneraj@uw.edu)

- bg-18-6579-2021-supplement-title-page.pdf
- M01\_CONUS.mp4
- bg-2021-49-supplement-version5.pdf

The copyright of individual parts of the supplement might differ from the article licence.
