# Supplementary material for: Extreme events driving year-to-year differences in gross primary productivity across the US
Source: Copernicus journal article supplement (doi:10.5194/bg-18-6579-2021), 2021-12-23
Supplement: Supplementary file 1 [file bg-18-6579-2021-supplement.zip › bg-2021-49-supplement-version5.pdf]

## Introduction

This supporting information contains nine additional figures, four tables, and one movie. Figure S1 shows a scatterplot of the TROPOMI SIF data against the AmeriFlux GPP data. Figure S2 shows scatterplots of TROPOMI SIF against AmeriFlux GPP for the various ecosystems. Figure S3 shows the impact of temporal averaging on the SIF-GPP relationship. Figure S4 shows the difference between GPP in fall (August, September, October) 2019 and 2018. Figure S5 shows a comparison of SIF and GPP at two AmeriFlux sites dominated by C3 plants and two dominated by C4 plants. Figure S6 is the same as main text Figure 4 but shows MODIS LAI instead of  $\text{NIR}_v$ . Figure S7 is the same as main text Figure 3 but shows FLUXCOM. Figure S8 is the same as main text Figure 2 but uses 3 Gaussians. Figure S9 is the same as main text Figure 2 but uses 4 Gaussians. Table 1 lists all of the eddy covariance sites used in this work. Table 2 lists the ecosystem weighting for each Gaussian in the 2-component model. Table 3 lists the ecosystem weighting for each Gaussian in the 3-component model. Table 4 lists the ecosystem weighting for each Gaussian in the 4-component model.

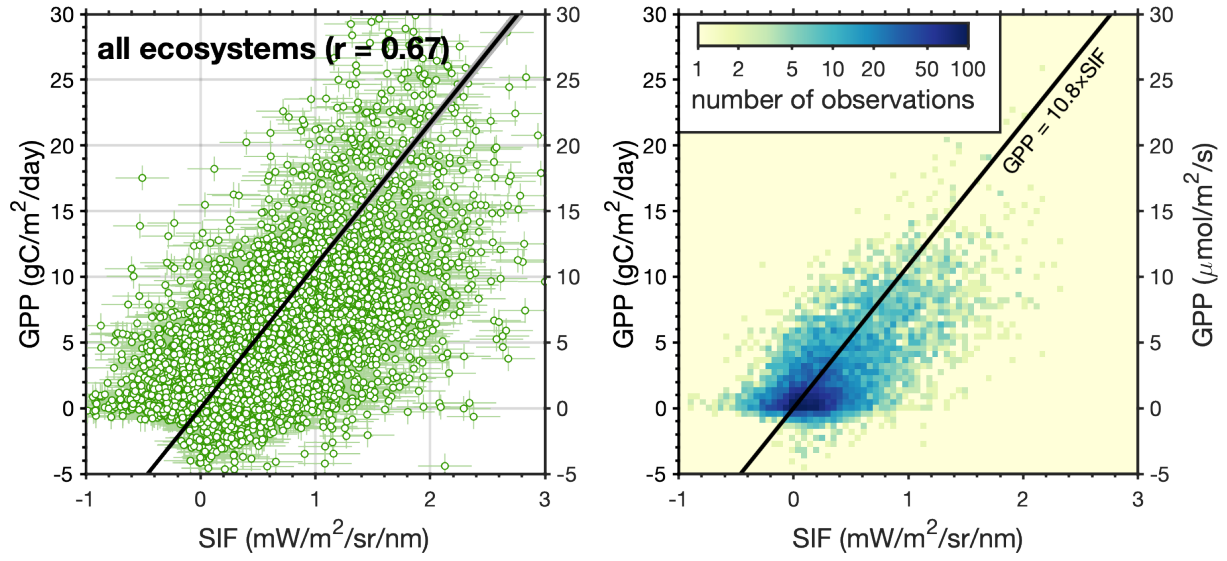

Figure S1: **Comparison of TROPOMI SIF and AmeriFlux GPP.** Scatterplot comparison of TROPOMI SIF (x-axis) and AmeriFlux GPP (y-axis) using all observations. Solid line is fitted using a bisquare regression. Light gray lines are bootstrap of the fit. (Left panel) All points plotted. (Right panel) Log-scale density map.

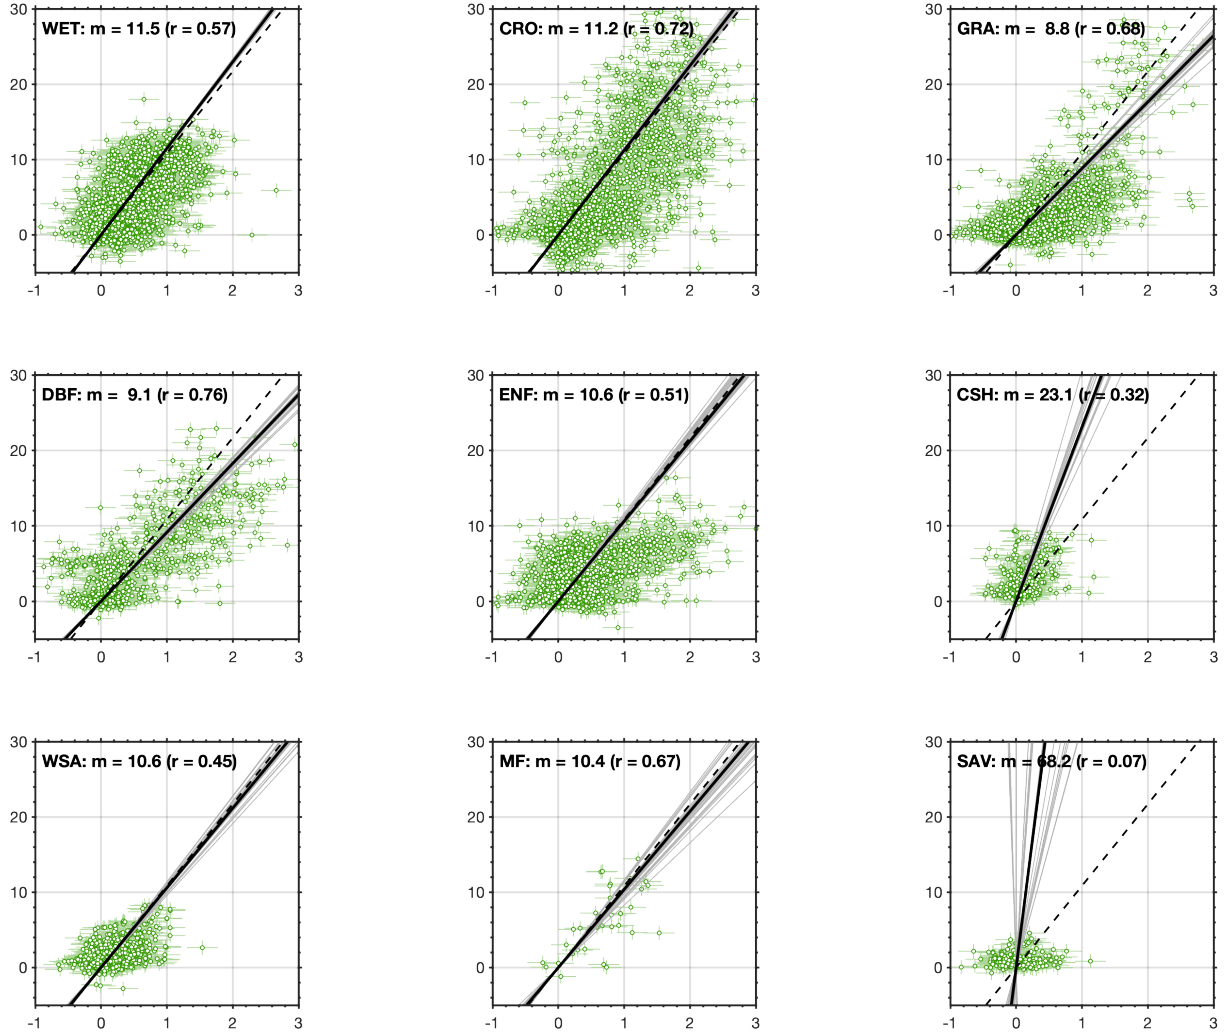

Figure S2: **Comparison of TROPOMI SIF and AmeriFlux GPP by ecosystem.** Same as left panel of Fig. S1 except broken down by ecosystem. x-axis is TROPOMI SIF ( $\text{mW/m}^2/\text{sr/s}$ ) and y-axis is AmeriFlux GPP ( $\mu\text{mol/m}^2/\text{s}$ ). WET = wetlands, CRO = croplands, GRA = grasslands, DBF = deciduous broadleaf forest, ENF = evergreen needleleaf forest, CSH = closed shrubland, WSA = woody savanna, MF = mixed forest, SAV = savanna. Open shrubland is not shown.

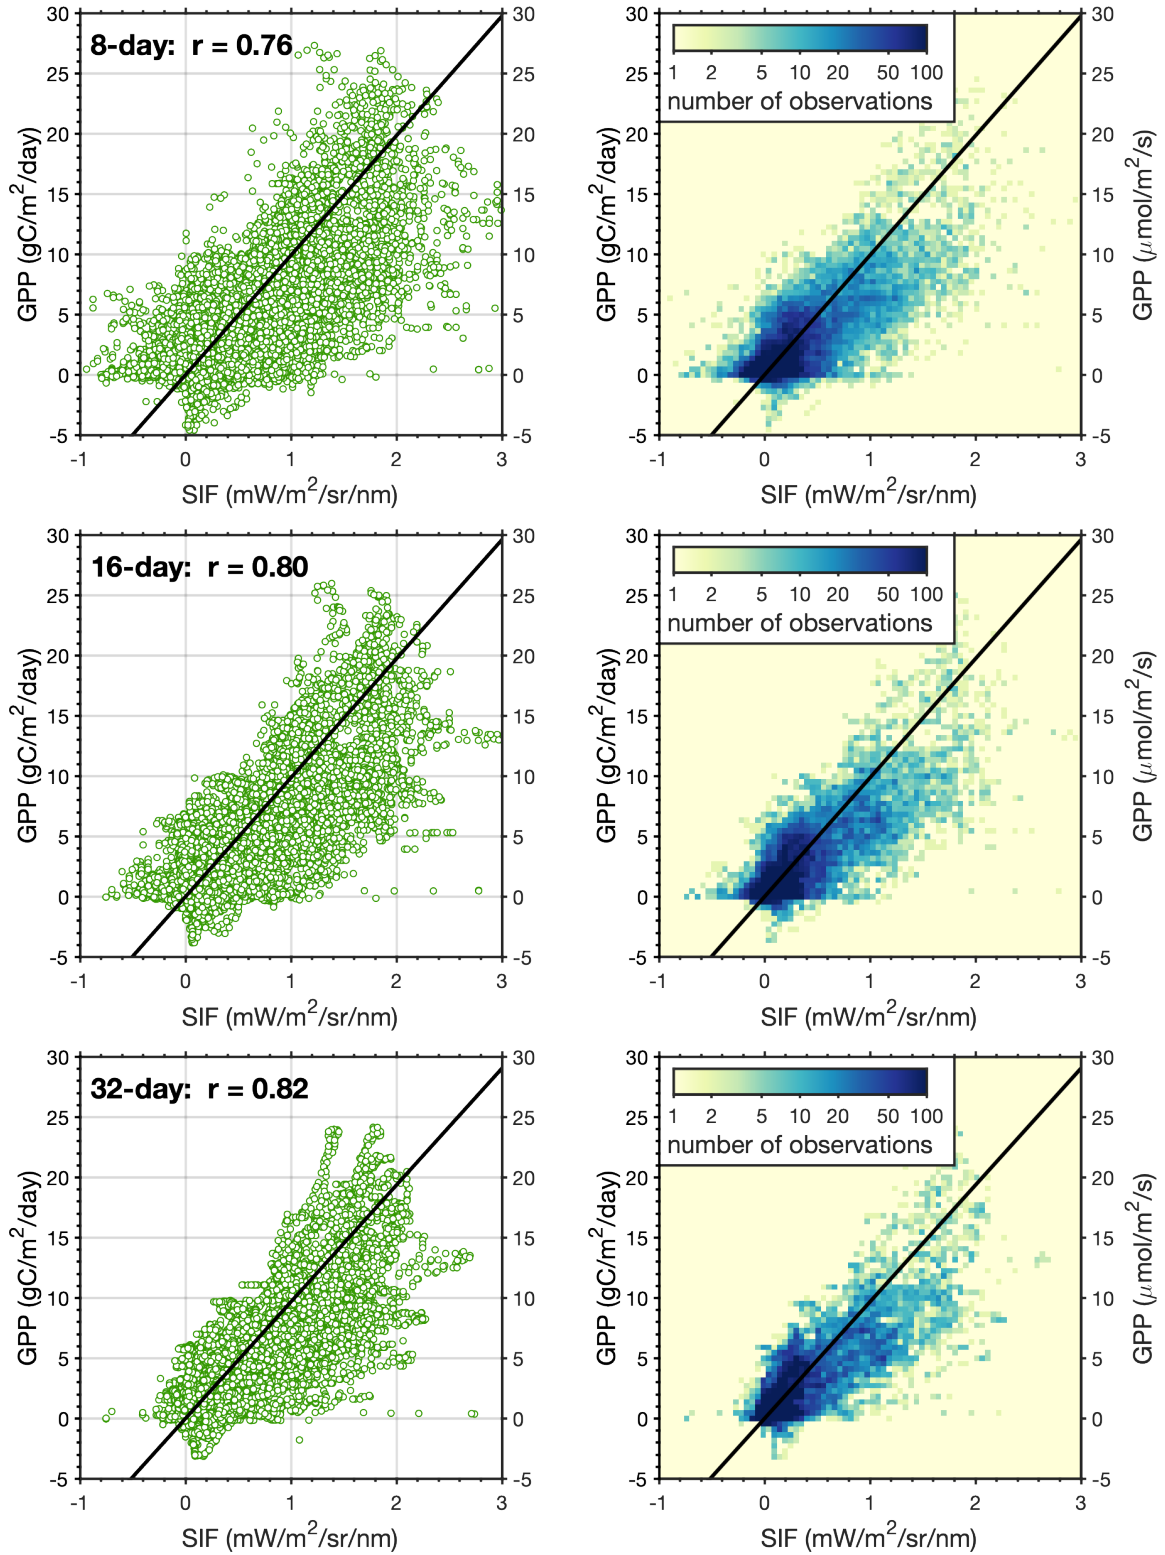

Figure S3: **Impact of temporal averaging on SIF-GPP relationship.** Same as Fig. S2 but using averaged data. Top row uses an 8-day moving window, middle row uses a 16-day moving window, and bottom row uses a 32-day moving window.

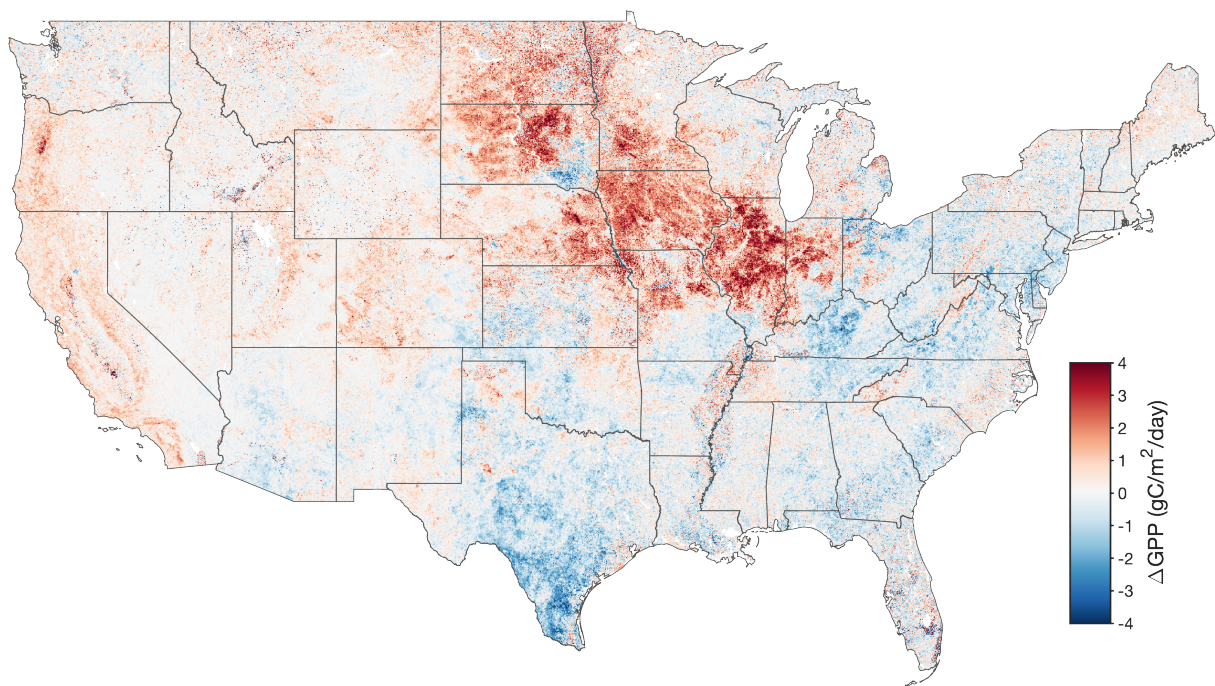

Figure S4: **Difference in GPP between Fall 2019 and Fall 2018.** Same as main text Fig. 3c but for August, September, and October.

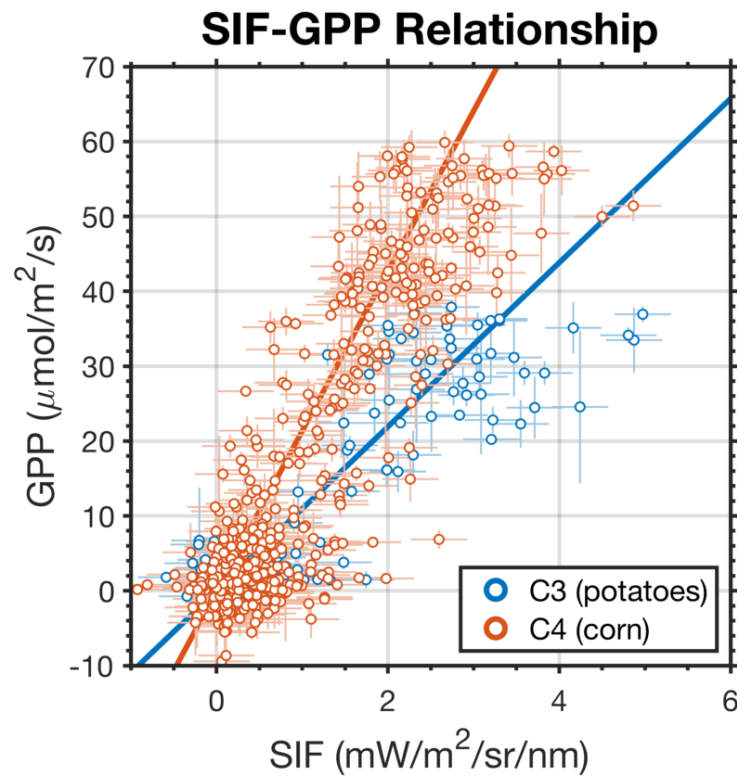

Figure S5: **Comparison of the SIF-GPP relationship for C3 and C4 plants.** Comparison of TROPOMI SIF and AmeriFlux GPP for C3 (blue) and C4 (red) plants at four AmeriFlux sites: US-CS1, US-CS3, US-Bi2, and US-KL1..

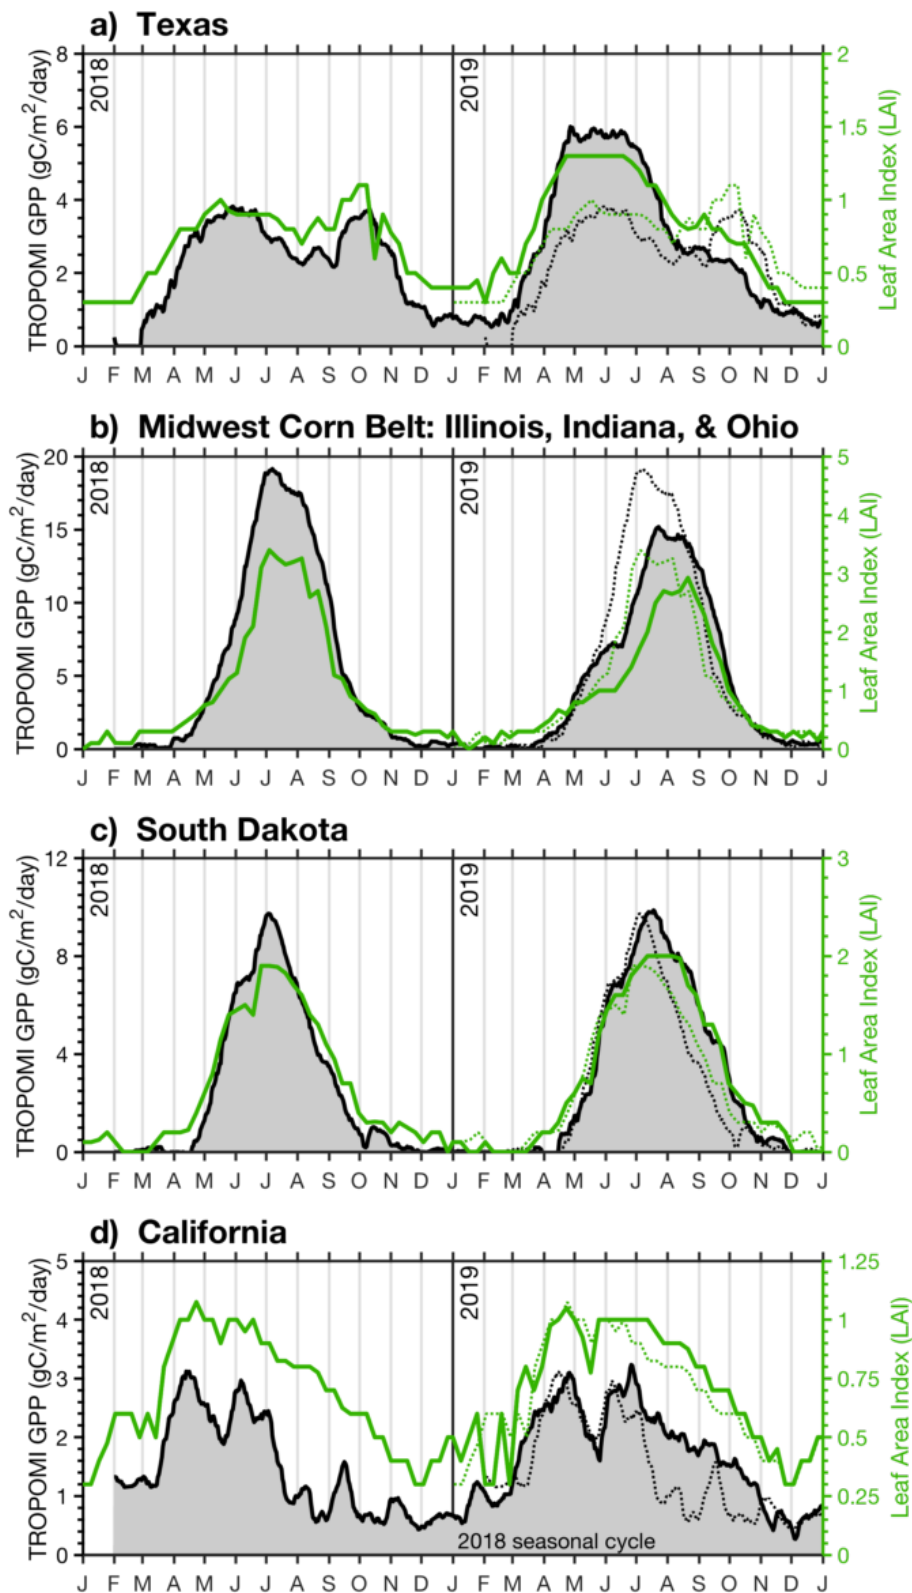

Figure S6: **Major drivers of interannual variability in CONUS GPP.** Same as main text Fig. 4 but show MODIS LAI instead of NIR<sub>v</sub>. Here we use the MCD15A2H MODIS LAI product that was available at a coarser time resolution.

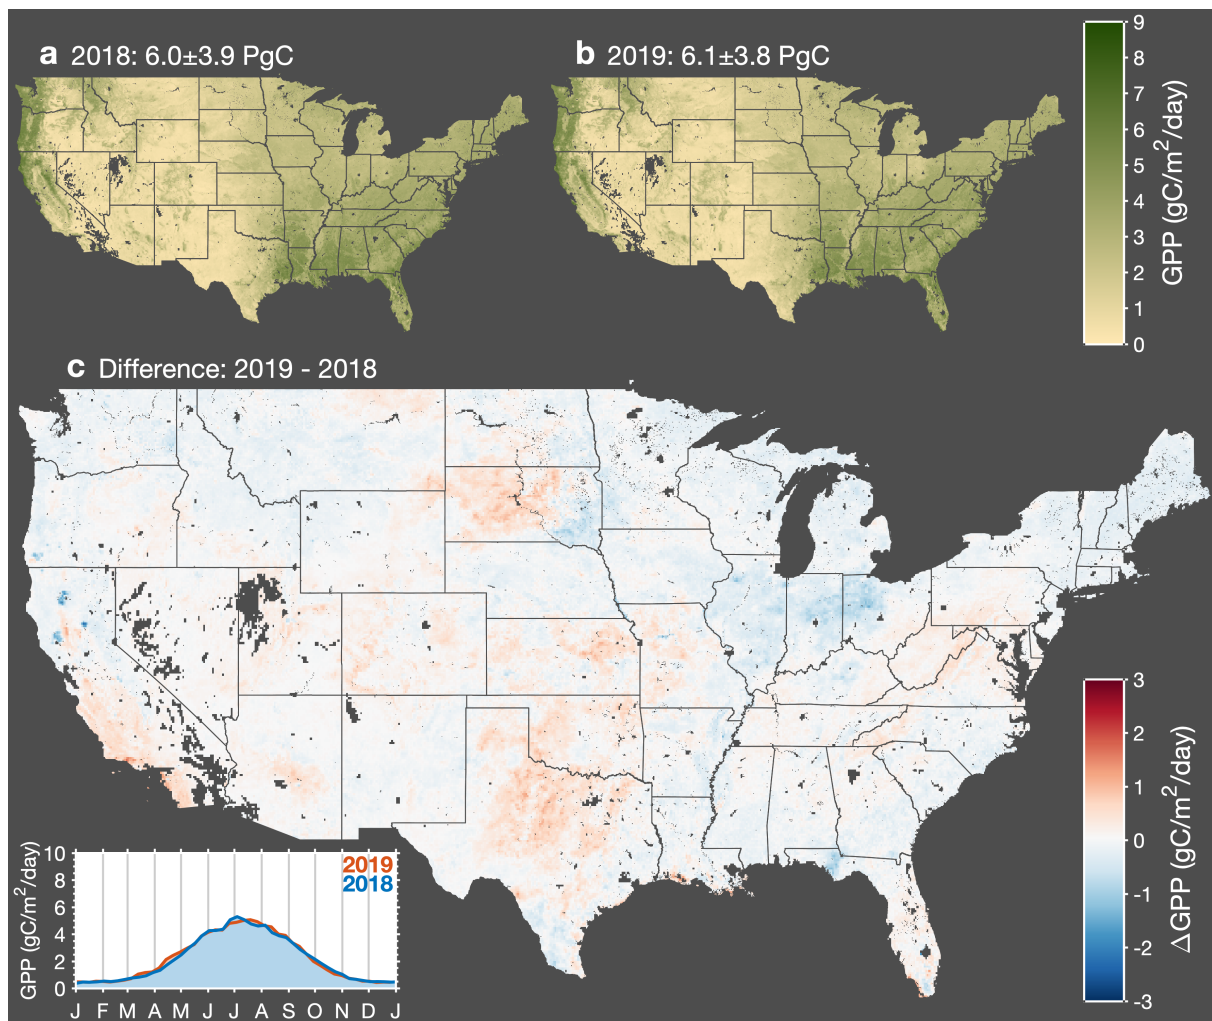

Figure S7: Same as main text Fig 3 but for FLUXCOM.

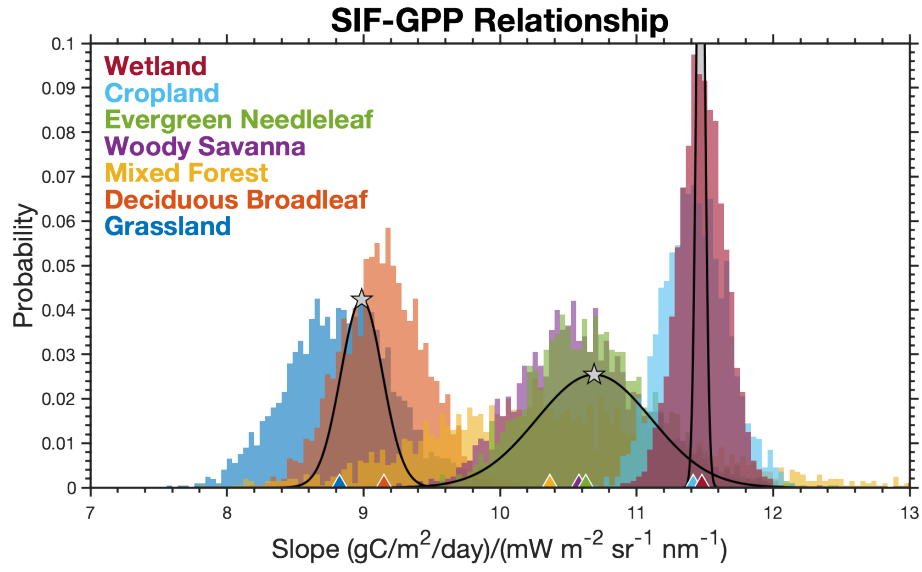

Figure S8: Same as main text Fig 2 but with 3 Gaussians.

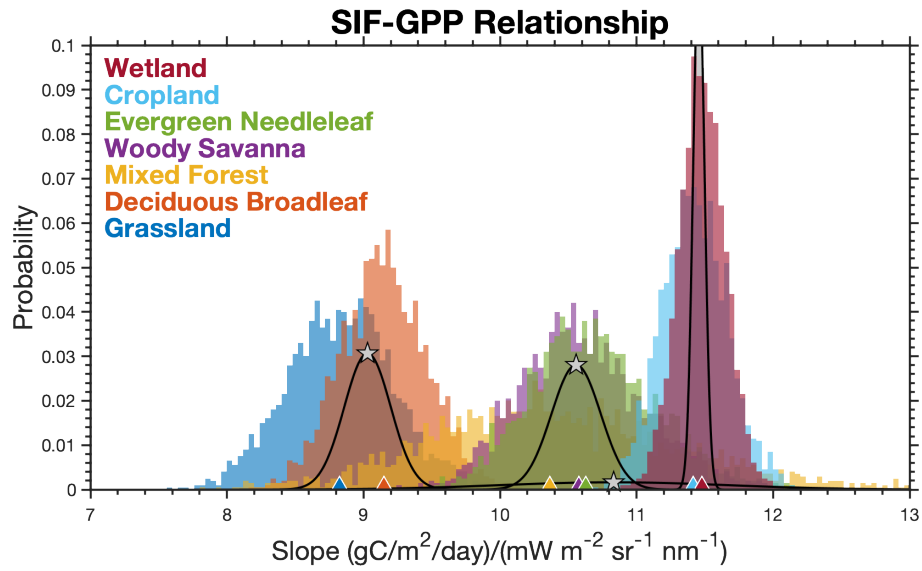

Figure S9: Same as main text Fig 2 but with 4 Gaussians.

Table 1: Eddy covariance sites used in this work.

| Station                                       | Code <sup>a</sup> | Lat. | Long. | IGBP Classification  |
|-----------------------------------------------|-------------------|------|-------|----------------------|
| Allequash Creek Site                          | ALQ               | 46°N | 90°W  | Wetland              |
| ARM Southern Great Plains site- Lamont        | ARM               | 37°N | 97°W  | Cropland             |
| Bangtail Mountain Meadow                      | BMM               | 46°N | 111°W | Grassland            |
| Bartlett Experimental Forest                  | Bar               | 44°N | 71°W  | Deciduous Broadleaf  |
| Bouldin Island Alfalfa                        | Bi1               | 38°N | 121°W | Cropland             |
| Bouldin Island corn                           | Bi2               | 38°N | 122°W | Cropland             |
| CAF-LTAR Cook East                            | CF1               | 47°N | 117°W | Cropland             |
| CAF-LTAR Cook West                            | CF2               | 47°N | 117°W | Cropland             |
| CAF-LTAR Boyd North                           | CF3               | 47°N | 117°W | Cropland             |
| CAF-LTAR Boyd South                           | CF4               | 47°N | 117°W | Cropland             |
| Charleston Mesquite Woodland                  | CMW               | 32°N | 110°W | Deciduous Broadleaf  |
| Central Sands Irrigated Agricultural Field    | CS1               | 44°N | 90°W  | Cropland             |
| Tri county school Pine Forest                 | CS2               | 44°N | 90°W  | Evergreen Needleleaf |
| Central Sands Irrigated Agricultural Field    | CS3               | 44°N | 90°W  | Cropland             |
| US Dairy Forage Research Center, Prairie du S | DFC               | 43°N | 90°W  | Cropland             |
| Eden Landing Ecological Reserve               | EDN               | 38°N | 122°W | Wetland              |
| GLEES                                         | GLE               | 41°N | 106°W | Evergreen Needleleaf |
| North Inlet Crab Haul Creek                   | HB1               | 33°N | 79°W  | Wetland              |
| Hobcaw Barony Mature Longleaf Pine            | HB2               | 33°N | 79°W  | Evergreen Needleleaf |
| Hobcaw Barony Longleaf Pine Restoration       | HB3               | 33°N | 79°W  | Evergreen Needleleaf |
| Hubbard Brook Experimental Forest             | HBK               | 44°N | 72°W  | Deciduous Broadleaf  |
| Hanford 100H grassland                        | Hn2               | 47°N | 119°W | Grassland            |
| Hanford 100H sagebrush                        | Hn3               | 47°N | 119°W | Open Shrubland       |
| Howland Forest (main tower)                   | Ho1               | 45°N | 69°W  | Evergreen Needleleaf |
| WV Jacks Run                                  | JRn               | 40°N | 80°W  | Grassland            |
| Jornada Experimental Range Mixed Shrubland    | Jo2               | 33°N | 107°W | Open Shrubland       |
| Kansas Field Station                          | KFS               | 39°N | 95°W  | Grassland            |
| KBS Lux Arbor Reserve Corn                    | KL1               | 42°N | 85°W  | Cropland             |
| KBS Lux Arbor Reserve Switchgrass             | KL2               | 42°N | 85°W  | Cropland             |
| KBS Lux Arbor Reserve Prairie                 | KL3               | 42°N | 85°W  | Cropland             |
| KBS Marshall Farms Corn                       | KM1               | 42°N | 85°W  | Grassland            |
| KBS Marshall Farms Prairie                    | KM2               | 42°N | 85°W  | Grassland            |
| KBS Marshall Farms Switchgrass                | KM3               | 42°N | 85°W  | Grassland            |
| KBS Marshall Farms Smooth Brome Grass (Ref)   | KM4               | 42°N | 85°W  | Cropland             |
| Kennedy Space Center (salt marsh)             | KS3               | 29°N | 81°W  | Wetland              |
| Lost Creek                                    | Los               | 46°N | 90°W  | Wetland              |
| Missouri Ozark Site                           | MOz               | 39°N | 92°W  | Deciduous Broadleaf  |
| Metolius mature ponderosa pine                | Me2               | 44°N | 122°W | Evergreen Needleleaf |
| Metolius Young Pine Burn                      | Me6               | 44°N | 122°W | Evergreen Needleleaf |
| Lake Mendota, Center for Limnology Site       | Men               | 43°N | 89°W  | Water                |
| Mountainair Pinyon-Juniper Woodland           | Mpj               | 34°N | 106°W | Open Shrubland       |
| Mt Bigelow                                    | MtB               | 32°N | 111°W | Evergreen Needleleaf |
| Mayberry Wetland                              | Myb               | 38°N | 122°W | Wetland              |
| NC Loblolly Plantation                        | NC2               | 36°N | 77°W  | Evergreen Needleleaf |
| NC Clearcut#3                                 | NC3               | 36°N | 77°W  | Evergreen Needleleaf |
| NC AlligatorRiver                             | NC4               | 36°N | 76°W  | Wetland              |
| Niwot Ridge Forest (LTER NWT1)                | NR1               | 40°N | 106°W | Evergreen Needleleaf |
| Florida pine flatwoods                        | ONA               | 27°N | 82°W  | Grassland            |
| RCEW Low Sagebrush                            | Rls               | 43°N | 117°W | Closed Shrubland     |
| RCEW Mountain Big Sagebrush                   | Rms               | 43°N | 117°W | Closed Shrubland     |
| Rosemount Prairie                             | Ro4               | 45°N | 93°W  | Grassland            |
| Rosemount I18 South                           | Ro5               | 45°N | 93°W  | Cropland             |
| Rosemount I18 North                           | Ro6               | 45°N | 93°W  | Cropland             |
| RCEW Upper Sheep Prescribed Fire              | Rwf               | 43°N | 117°W | Closed Shrubland     |

<sup>a</sup>Three letter codes beginning with an “x” are part of NEON.

Table 1 continued.

| Station                                       | Code <sup>a</sup> | Lat. | Long. | IGBP Classification  |
|-----------------------------------------------|-------------------|------|-------|----------------------|
| RCEW Mountain Big Sagebrush                   | Rms               | 43°N | 117°W | Closed Shrubland     |
| Rosemount Prairie                             | Ro4               | 45°N | 93°W  | Grassland            |
| Rosemount I18 South                           | Ro5               | 45°N | 93°W  | Cropland             |
| Rosemount I18 North                           | Ro6               | 45°N | 93°W  | Cropland             |
| RCEW Upper Sheep Prescribed Fire              | Rwf               | 43°N | 117°W | Closed Shrubland     |
| Reynolds Creek Wyoming big sagebrush          | Rws               | 43°N | 117°W | Open Shrubland       |
| Santa Rita Grassland                          | SRG               | 32°N | 111°W | Grassland            |
| Santa Rita Mesquite                           | SRM               | 32°N | 111°W | Woody Savanna        |
| Santa Rita Experimental Range Mesquite Savann | SRS               | 32°N | 111°W | Woody Savanna        |
| Sevilleta grassland                           | Seg               | 34°N | 107°W | Grassland            |
| Sevilleta shrubland                           | Ses               | 34°N | 107°W | Open Shrubland       |
| Sherman Island Restored Wetland               | Sne               | 38°N | 122°W | Grassland            |
| Sherman Barn                                  | Snf               | 38°N | 122°W | Grassland            |
| St Jones Reserve                              | StJ               | 39°N | 75°W  | Wetland              |
| Sylvania Wilderness Area                      | Syv               | 46°N | 89°W  | Mixed Forest         |
| Tonzi Ranch                                   | Ton               | 38°N | 121°W | Woody Savanna        |
| Twitchell Wetland West Pond                   | Tw1               | 38°N | 122°W | Wetland              |
| Twitchell East End Wetland                    | Tw4               | 38°N | 122°W | Wetland              |
| East Pond Wetland                             | Tw5               | 38°N | 122°W | Wetland              |
| UMBS Disturbance                              | UMd               | 46°N | 85°W  | Deciduous Broadleaf  |
| Vaira Ranch- Ione                             | Var               | 38°N | 121°W | Grassland            |
| Valles Caldera Mixed Conifer                  | Vcm               | 36°N | 107°W | Evergreen Needleleaf |
| Valles Caldera Ponderosa Pine                 | Vcp               | 36°N | 107°W | Evergreen Needleleaf |
| Willow Creek                                  | WCr               | 46°N | 90°W  | Deciduous Broadleaf  |
| Walnut Gulch Lucky Hills Shrub                | Whs               | 32°N | 110°W | Open Shrubland       |
| Willard Juniper Savannah                      | Wjs               | 34°N | 106°W | Savanna              |
| Walnut Gulch Kendall Grasslands               | Wkg               | 32°N | 110°W | Grassland            |
| NEON Abby Road (ABBY)                         | xAB               | 46°N | 122°W | Evergreen Needleleaf |
| NEON Bartlett Experimental Forest (BART)      | xBR               | 44°N | 71°W  | Deciduous Broadleaf  |
| NEON Central Plains Experimental Range (CPER) | xCP               | 41°N | 105°W | Grassland            |
| NEON Dakota Coteau Field School (DCFS)        | xDC               | 47°N | 99°W  | Grassland            |
| NEON Dead Lake (DELA)                         | xDL               | 33°N | 88°W  | Mixed Forest         |
| NEON Great Smoky Mountains National Park, Twi | xGR               | 36°N | 84°W  | Deciduous Broadleaf  |
| NEON Harvard Forest (HARV)                    | xHA               | 43°N | 72°W  | Deciduous Broadleaf  |
| NEON Jones Ecological Research Center (JERC)  | xJE               | 31°N | 84°W  | Evergreen Needleleaf |
| NEON Jornada LTER (JORN)                      | xJR               | 33°N | 107°W | Open Shrubland       |
| NEON Konza Prairie Biological Station - Reloc | xKA               | 39°N | 97°W  | Grassland            |
| NEON Konza Prairie Biological Station (KONZ)  | xKZ               | 39°N | 97°W  | Grassland            |
| NEON Northern Great Plains Research Laborator | xNG               | 47°N | 101°W | Grassland            |
| NEON Onaqui-Ault (ONAQ)                       | xNQ               | 40°N | 112°W | Open Shrubland       |
| NEON Rocky Mountain National Park, CASTNET (R | xRM               | 40°N | 106°W | Evergreen Needleleaf |
| NEON Smithsonian Environmental Research Cente | xSE               | 39°N | 77°W  | Deciduous Broadleaf  |
| NEON North Sterling, CO (STER)                | xSL               | 40°N | 103°W | Cropland             |
| NEON Soaproot Saddle (SOAP)                   | xSP               | 37°N | 119°W | Evergreen Needleleaf |
| NEON Santa Rita Experimental Range (SRER)     | xSR               | 32°N | 111°W | Open Shrubland       |
| NEON Steigerwaldt Land Services (STEI)        | xST               | 46°N | 90°W  | Deciduous Broadleaf  |
| NEON Lower Teakettle (TEAK)                   | xTE               | 37°N | 119°W | Evergreen Needleleaf |
| NEON Treehaven (TREE)                         | xTR               | 45°N | 90°W  | Deciduous Broadleaf  |
| NEON The University of Kansas Field Station ( | xUK               | 39°N | 95°W  | Deciduous Broadleaf  |
| NEON University of Notre Dame Environmental R | xUN               | 46°N | 90°W  | Mixed Forest         |
| NEON Woodworth (WOOD)                         | xWD               | 47°N | 99°W  | Grassland            |
| NEON Wind River Experimental Forest (WREF)    | xWR               | 46°N | 122°W | Evergreen Needleleaf |
| NEON Yellowstone Northern Range (Frog Rock) ( | xYE               | 45°N | 111°W | Evergreen Needleleaf |

<sup>a</sup>Three letter codes beginning with an “x” are part of NEON.

Table 2: Ecosystem weighting with 2 Gaussians.

| Ecosystem | Gaussian 1<br>( $9.06 \pm 0.21$ ) | Gaussian 2<br>( $11.03 \pm 0.34$ ) |
|-----------|-----------------------------------|------------------------------------|
| CRO       | 0.00                              | 1.00                               |
| WET       | 0.00                              | 1.00                               |
| WSA       | 0.03                              | 0.97                               |
| MF        | 0.18                              | 0.82                               |
| GRA       | 0.99                              | 0.01                               |
| DBF       | 0.96                              | 0.04                               |
| ENF       | 0.01                              | 0.99                               |

Table 3: Ecosystem weighting with 3 Gaussians.

| Ecosystem | Gaussian 1<br>( $8.99 \pm 0.15$ ) | Gaussian 2<br>( $11.47 \pm 0.03$ ) | Gaussian 3<br>( $10.69 \pm 0.42$ ) |
|-----------|-----------------------------------|------------------------------------|------------------------------------|
| CRO       | 0.00                              | 0.34                               | 0.66                               |
| WET       | 0.00                              | 0.41                               | 0.59                               |
| WSA       | 0.01                              | 0.04                               | 0.95                               |
| MF        | 0.13                              | 0.06                               | 0.81                               |
| GRA       | 0.91                              | 0.00                               | 0.09                               |
| DBF       | 0.83                              | 0.00                               | 0.17                               |
| ENF       | 0.01                              | 0.05                               | 0.94                               |

Table 4: Ecosystem weighting with 4 Gaussians.

| Ecosystem | Gaussian 1<br>( $9.03 \pm 0.17$ ) | Gaussian 2<br>( $11.46 \pm 0.04$ ) | Gaussian 3<br>( $10.56 \pm 0.18$ ) | Gaussian 4<br>( $10.83 \pm 0.84$ ) |
|-----------|-----------------------------------|------------------------------------|------------------------------------|------------------------------------|
| CRO       | 0.00                              | 0.62                               | 0.17                               | 0.21                               |
| WET       | 0.00                              | 0.69                               | 0.11                               | 0.19                               |
| WSA       | 0.02                              | 0.09                               | 0.66                               | 0.23                               |
| MF        | 0.20                              | 0.12                               | 0.48                               | 0.21                               |
| GRA       | 0.95                              | 0.00                               | 0.01                               | 0.04                               |
| DBF       | 0.91                              | 0.00                               | 0.03                               | 0.06                               |
| ENF       | 0.01                              | 0.11                               | 0.65                               | 0.23                               |
